# Supplementary material for: Independent and Joint Associations of Social Participation and Depressive Symptoms with Incident Stroke Risk in Older Adults: A Prospective Cohort Study Based on CHARLS and ELSA
Source: Research Square preprint supplement (doi:10.21203/rs.3.rs-8765182/v1), 2026-02-16
Supplement: Supplementary file 1 [file 4e085413c74c6ddd430f023c.docx]

**Table 1: Baseline characteristics of participants in CHARLS and ELSA**

| **Characteristics** | **CHARLS (n=10555)** | | | | | **ELSA (n=5321)** | | | | |
| --- | --- | --- | --- | --- | --- | --- | --- | --- | --- | --- |
| **SP+/DS−** | **SP−/DS−** | **SP+/DS+** | **SP−/DS+** | **Overall** | **SP+/DS−** | **SP−/DS−** | **SP+/DS+** | **SP−/DS+** | **Overall** |
| **Total** | 3534 | 3662 | 1363 | 1996 | 10555 | 1828 | 2941 | 148 | 404 | 5321 |
| **Age, mean (S.D.)** | 57.5 (9.0) | 58.2 (8.7) | 59.0 (9.0) | 59.3 (8.6) | 58.3 (8.8) | 65.6 (8.2) | 65.1 (8.5) | 64.8 (9.3) | 64.0 (8.7) | 65.1 (8.4) |
| **Sex, n (%)** |  |  |  |  |  |  |  |  |  |  |
| Female | 1726 (48.8) | 1774 (48.4) | 902 (66.2) | 1273 (63.8) | 5675 (53.8) | 929 (50.8) | 1652 (56.2) | 109 (73.6) | 277 (68.6) | 2967 (55.8) |
| Male | 1808 (51.2) | 1888 (51.6) | 461 (33.8) | 723 (36.2) | 4880 (46.2) | 899 (49.2) | 1289 (43.8) | 39 (26.4) | 127 (31.4) | 2354 (44.2) |
| **Marital status, n (%)** |  |  |  |  |  |  |  |  |  |  |
| Married and living with spouse | 3064 (86.7) | 3221 (88.0) | 1041 (76.4) | 1646 (82.5) | 8972 (85.0) | 1364 (77.5) | 2106 (75.3) | 91 (62.8) | 220 (56.6) | 3781 (74.3) |
| Married but living without spouse | 160 (4.5) | 110 (3.0) | 93 (6.8) | 66 (3.3) | 429 (4.1) | — | — | — | — | — |
| Single/divorced/widowed | 310 (8.8) | 331 (9.0) | 229 (16.8) | 284 (14.2) | 1154 (10.9) | 396 (22.5) | 690 (24.7) | 54 (37.2) | 169 (43.4) | 1309 (25.7) |
| **Education level, n (%)** |  |  |  |  |  |  |  |  |  |  |
| Elementary school or below | 2080 (58.9) | 2498 (68.2) | 1030 (75.6) | 1602 (80.3) | 7210 (68.3) | 239 (13.9) | 831 (30.8) | 36 (26.1) | 151 (41.1) | 1257 (25.6) |
| Middle school or above | 1454 (41.1) | 1164 (31.8) | 333 (24.4) | 394 (19.7) | 3345 (31.7) | 1476 (86.1) | 1863 (69.2) | 102 (73.9) | 216 (58.9) | 3657 (74.4) |
| **Residence, n (%)** |  |  |  |  |  |  |  |  |  |  |
| Rural | 2051 (58.0) | 2366 (64.6) | 997 (73.1) | 1440 (72.1) | 6854 (64.9) | — | — | — | — | — |
| Urban | 1483 (42.0) | 1296 (35.4) | 366 (26.9) | 556 (27.9) | 3701 (35.1) | 1828 (100.0) | 2941 (100.0) | 148 (100.0) | 404 (100.0) | 5321 (100.0) |
| **Smoking status, n (%)** |  |  |  |  |  |  |  |  |  |  |
| Non-smoker | 2037 (57.6) | 2202 (60.1) | 907 (66.5) | 1333 (66.8) | 6479 (61.4) | 834 (45.6) | 1119 (38.0) | 65 (43.9) | 143 (35.4) | 2161 (40.6) |
| Smoker | 1497 (42.4) | 1460 (39.9) | 456 (33.5) | 663 (33.2) | 4076 (38.6) | 994 (54.4) | 1822 (62.0) | 83 (56.1) | 261 (64.6) | 3160 (59.4) |
| **Drinking status, n (%)** |  |  |  |  |  |  |  |  |  |  |
| Drinker | 1141 (34.1) | 1040 (30.0) | 322 (24.7) | 432 (22.6) | 2935 (29.3) | 1674 (92.4) | 2595 (89.4) | 123 (83.1) | 313 (78.4) | 4705 (89.4) |
| Non-drinker | 2202 (65.9) | 2427 (70.0) | 980 (75.3) | 1479 (77.4) | 7088 (70.7) | 137 (7.6) | 308 (10.6) | 25 (16.9) | 86 (21.6) | 556 (10.6) |
| **Number of chronic conditions, n (%)** |  |  |  |  |  |  |  |  |  |  |
| ≥2 | 761 (21.5) | 791 (21.6) | 567 (41.6) | 795 (39.8) | 2914 (27.6) | 739 (40.4) | 1178 (40.1) | 84 (56.8) | 260 (64.4) | 2261 (42.5) |
| 1 | 1085 (30.7) | 1139 (31.1) | 429 (31.5) | 654 (32.8) | 3307 (31.3) | 589 (32.2) | 991 (33.7) | 36 (24.3) | 88 (21.8) | 1704 (32.0) |
| 0 | 1688 (47.8) | 1732 (47.3) | 367 (26.9) | 547 (27.4) | 4334 (41.1) | 500 (27.4) | 772 (26.2) | 28 (18.9) | 56 (13.9) | 1356 (25.5) |
| **Incident stroke, n (%)** |  |  |  |  |  |  |  |  |  |  |
| No | 3250 (92.0) | 3363 (91.8) | 1218 (89.4) | 1760 (88.2) | 9591 (90.9) | 1761 (96.3) | 2836 (96.4) | 142 (95.9) | 381 (94.3) | 5120 (96.2) |
| Yes | 284 (8.0) | 299 (8.2) | 145 (10.6) | 236 (11.8) | 964 (9.1) | 67 (3.7) | 105 (3.6) | 6 (4.1) | 23 (5.7) | 201 (3.8) |
| **Annual household expenditure, mean (S.D.)** | 8102.4 (11259.4) | 6357.5 (7138.9) | 6710.8 (8838.8) | 6059.3 (8153.6) | 6940.0 (9158.4) | 8942.4 (42689.7) | 5637.4 (30947.2) | 8305.4 (45475.1) | 4261.6 (40785.6) | 6741.1 (36602.0) |
| **BMI, mean (S.D.)** | 24.1 (3.8) | 23.4 (3.8) | 23.4 (4.0) | 23.0 (3.9) | 23.6 (3.9) | 28.1 (4.8) | 28.2 (5.1) | 28.5 (6.1) | 29.5 (6.3) | 28.3 (5.1) |
| **Follow-up time, mean (S.D.)** | 7.0 (0.5) | 6.9 (0.6) | 6.9 (0.5) | 6.9 (0.7) | 6.9 (0.6) | 5.9 (0.5) | 5.9 (0.5) | 5.9 (0.6) | 5.9 (0.6) | 5.9 (0.5) |

Notes: *S.D.*standard deviation, *CHARLS* China Health and Retirement Longitudinal Study, *ELSA* English Longitudinal Study of Ageing, *BMI* Body Mass Index, *SP+* participation in ≥1 social activity at baseline, *SP−* no participation in any activity, *DS+* CES-D score above the cut-point (CHARLS: CES-D-10 >10; ELSA: CES-D-8 ≥4), *DS−* below the cut-point.

**Table 2. Stroke hazard ratios for social participation and depressive symptoms**

| **Comparison** | **Adjustment** | **CHARLS** | | **ELSA** | |
| --- | --- | --- | --- | --- | --- |
| **HR (95% CI)** | ***p*** | **HR (95% CI)** | ***p*** |
| SP− | Model1 | 1.11 (0.97, 1.27) | 0.14 | 1.00 (0.74, 1.34) | 0.97 |
|  | Model2 | 1.09 (0.94, 1.26) | 0.26 | 1.03 (0.74, 1.43) | 0.87 |
|  | Model3 | 1.14 (0.96, 1.34) | 0.13 | 1.05 (0.74, 1.51) | 0.78 |
| DS+ | Model1 | 1.48 (1.29, 1.70) | <0.001 | 1.36 (0.91, 2.05) | 0.14 |
|  | Model2 | 1.49 (1.28, 1.73) | <0.001 | 1.53 (0.97, 2.41) | 0.07 |
|  | Model3 | 1.40 (1.18, 1.65) | <0.001 | 1.54 (0.95, 2.51) | 0.08 |
| (SP−/DS−) /(SP+/DS−) | Model1 | 1.05 (0.89, 1.25) | 0.56 | 0.93 (0.68, 1.28) | 0.67 |
|  | Model2 | 1.02 (0.84, 1.23) | 0.85 | 0.92 (0.65, 1.30) | 0.63 |
|  | Model3 | 1.03 (0.85, 1.26) | 0.74 | 0.93 (0.64, 1.36) | 0.72 |
| (SP+/DS+) /(SP+/DS−) | Model1 | 1.43 (1.16, 1.77) | <0.001 | 1.01 (0.44, 2.33) | 0.99 |
|  | Model2 | 1.43 (1.13, 1.80) | 0.003 | 0.74 (0.26, 2.06) | 0.56 |
|  | Model3 | 1.40 (1.10, 1.78) | 0.006 | 0.72 (0.25, 2.10) | 0.55 |
| (SP−/DS+) /(SP+/DS−) | Model1 | 1.59 (1.32, 1.90) | <0.001 | 1.43 (0.87, 2.33) | 0.16 |
|  | Model2 | 1.57 (1.28, 1.93) | <0.001 | 1.81 (1.06, 3.11) | 0.03 |
|  | Model3 | 1.56 (1.27, 1.93) | <0.001 | 1.87 (1.04, 3.37) | 0.04 |

Notes: *CHARLS* China Health and Retirement Longitudinal Study, *ELSA* English Longitudinal Study of Ageing, *SP+* participation in ≥1 social activity at baseline, *SP−* no participation in any activity, *DS+* CES-D score above the cut-point (CHARLS: CES-D-10 >10; ELSA: CES-D-8 ≥4), *DS−* below the cut-point. *Model 1* unadjusted (crude) model, *Model 2* adjusted for age, sex, marital status, education level, and annual household expenditure, *Model 3* adjusted for *Model 2* plus smoking status, alcohol drinking status, BMI, and number of chronic conditions.

**Table 3. Stratified associations of joint SP/DS phenotype with incident stroke**

| **Comparison** | **Stratification** | **Subgroup** | **CHARLS** | | | **ELSA** | | |
| --- | --- | --- | --- | --- | --- | --- | --- | --- |
| **HR (95% CI)** | ***p*** | **Interaction_*p*** | **HR (95% CI)** | ***p*** | **Interaction_*p*** |
| (SP−/DS−) /(SP+/DS−) | Age | <65 | 1.07 (0.86, 1.32) | 0.56 | 0.63 | 0.62 (0.30, 1.26) | 0.19 | 0.77 |
|  |  | ≥65 | 0.97 (0.72, 1.31) | 0.86 |  | 0.99 (0.66, 1.48) | 0.96 |  |
|  | Chronic | Chronic=0 | 1.14 (0.93, 1.41) | 0.2 | 0.15 | 0.85 (0.56, 1.27) | 0.42 | 0.94 |
|  |  | Chronic≥1 | 0.86 (0.62, 1.19) | 0.36 |  | 0.82 (0.42, 1.60) | 0.56 |  |
|  | Drinking | Non-drinker | 1.16 (0.93, 1.44) | 0.19 | 0.2 | 1.80 (0.72, 4.51) | 0.21 | 0.08 |
|  |  | Drinker | 0.90 (0.66, 1.24) | 0.53 |  | 0.66 (0.44, 0.98) | 0.04 |  |
|  | Obesity | BMI<25 | 1.05 (0.82, 1.34) | 0.71 | 0.56 | 0.44 (0.22, 0.87) | 0.02 | 0.39 |
|  |  | BMI≥25 | 1.17 (0.88, 1.56) | 0.28 |  | 0.98 (0.62, 1.54) | 0.93 |  |
|  | Sex | Female | 1.02 (0.79, 1.33) | 0.86 | 0.79 | 1.16 (0.67, 2.01) | 0.6 | 0.68 |
|  |  | Male | 1.08 (0.85, 1.36) | 0.54 |  | 0.70 (0.45, 1.11) | 0.13 |  |
|  | Smoking | Non-smoker | 1.02 (0.80, 1.29) | 0.88 | 0.64 | 1.11 (0.61, 2.01) | 0.74 | 0.47 |
|  |  | Smoker | 1.11 (0.86, 1.43) | 0.44 |  | 0.74 (0.48, 1.13) | 0.16 |  |
| (SP+/DS+) /(SP+/DS−) | Age | <65 | 1.55 (1.20, 2.01) | 0.001 | 0.14 | 0.47 (0.06, 3.64) | 0.47 | 0.97 |
|  |  | ≥65 | 1.11 (0.76, 1.60) | 0.6 |  | 0.88 (0.27, 2.89) | 0.84 |  |
|  | Chronic | Chronic=0 | 1.53 (1.19, 1.97) | 0.001 | 0.33 | 0.75 (0.27, 2.10) | 0.59 | 0.89 |
|  |  | Chronic≥1 | 1.22 (0.82, 1.80) | 0.33 |  | NA | NA |  |
|  | Drinking | Non-drinker | 1.46 (1.12, 1.89) | 0.004 | 0.61 | 0.72 (0.09, 5.74) | 0.75 | 0.72 |
|  |  | Drinker | 1.28 (0.84, 1.94) | 0.25 |  | 0.70 (0.22, 2.29) | 0.56 |  |
|  | Obesity | BMI<25 | 1.42 (1.06, 1.91) | 0.02 | 0.82 | NA | NA | 0.99 |
|  |  | BMI≥25 | 1.35 (0.93, 1.96) | 0.11 |  | 1.12 (0.39, 3.18) | 0.84 |  |
|  | Sex | Female | 1.63 (1.23, 2.15) | 0.001 | 0.2 | 0.34 (0.05, 2.55) | 0.29 | 0.72 |
|  |  | Male | 1.21 (0.86, 1.72) | 0.28 |  | 1.30 (0.40, 4.23) | 0.66 |  |
|  | Smoking | Non-smoker | 1.58 (1.21, 2.07) | 0.001 | 0.28 | NA | NA | 0.51 |
|  |  | Smoker | 1.24 (0.87, 1.76) | 0.24 |  | 0.87 (0.31, 2.45) | 0.79 |  |
| (SP−/DS+) /(SP+/DS−) | Age | <65 | 1.69 (1.35, 2.11) | 0.001 | 0.17 | 1.53 (0.66, 3.55) | 0.32 | 0.23 |
|  |  | ≥65 | 1.28 (0.93, 1.77) | 0.13 |  | 1.36 (0.65, 2.86) | 0.41 |  |
|  | Chronic | Chronic=0 | 1.66 (1.33, 2.07) | 0.001 | 0.47 | 1.18 (0.65, 2.15) | 0.6 | 0.73 |
|  |  | Chronic≥1 | 1.43 (1.03, 1.99) | 0.03 |  | 2.28 (0.72, 7.20) | 0.16 |  |
|  | Drinking | Non-drinker | 1.64 (1.31, 2.06) | 0.001 | 0.52 | 2.13 (0.70, 6.54) | 0.19 | 0.43 |
|  |  | Drinker | 1.43 (0.99, 2.05) | 0.05 |  | 1.12 (0.58, 2.14) | 0.74 |  |
|  | Obesity | BMI<25 | 1.50 (1.15, 1.94) | 0.002 | 0.49 | 0.52 (0.15, 1.87) | 0.32 | 0.43 |
|  |  | BMI≥25 | 1.73 (1.25, 2.38) | 0.001 |  | 1.94 (1.03, 3.66) | 0.04 |  |
|  | Sex | Female | 1.57 (1.21, 2.03) | 0.001 | 0.63 | 1.93 (0.91, 4.10) | 0.09 | 0.84 |
|  |  | Male | 1.71 (1.31, 2.24) | 0.001 |  | 1.13 (0.51, 2.47) | 0.77 |  |
|  | Smoking | Non-smoker | 1.48 (1.16, 1.89) | 0.002 | 0.23 | 0.86 (0.25, 2.97) | 0.82 | 0.31 |
|  |  | Smoker | 1.85 (1.40, 2.44) | 0.001 |  | 1.47 (0.81, 2.68) | 0.21 |  |

Notes: *CHARLS* China Health and Retirement Longitudinal Study, *ELSA* English Longitudinal Study of Ageing, *BMI* Body Mass Index, *SP+* participation in ≥1 social activity at baseline, *SP−* no participation in any activity, *DS+* CES-D score above the cut-point (CHARLS: CES-D-10 >10; ELSA: CES-D-8 ≥4), *DS−* below the cut-point. NA indicates estimates not estimable due to sparse events (e.g., zero events in a subgroup) or model non-convergence.

**Table 4. Multiple-imputation sensitivity of SP/DS phenotypes for stroke risk**

| **Comparison** | **Adjustment** | **CHARLS** | | **ELSA** | |
| --- | --- | --- | --- | --- | --- |
| **HR (95% CI)** | ***p*** | **HR (95% CI)** | ***p*** |
| SP− | Model1 | 1.09 (0.96, 1.24) | 0.19 | 1.01 (0.76, 1.35) | 0.93 |
|  | Model2 | 1.08 (0.95, 1.23) | 0.23 | 1.04 (0.76, 1.43) | 0.79 |
|  | Model3 | 1.10 (0.97, 1.26) | 0.15 | 1.03 (0.75, 1.42) | 0.86 |
| DS+ | Model1 | 1.42 (1.25, 1.62) | <0.001 | 1.43 (0.97, 2.13) | 0.07 |
|  | Model2 | 1.41 (1.23, 1.60) | <0.001 | 1.63 (1.06, 2.50) | 0.03 |
|  | Model3 | 1.40 (1.23, 1.60) | <0.001 | 1.57 (1.02, 2.43) | 0.04 |
| (SP−/DS−) /(SP+/DS−) | Model1 | 1.02 (0.87, 1.20) | 0.8 | 0.94 (0.69, 1.28) | 0.7 |
|  | Model2 | 1.01 (0.86, 1.19) | 0.87 | 0.92 (0.66, 1.29) | 0.64 |
|  | Model3 | 1.04 (0.88, 1.23) | 0.67 | 0.91 (0.64, 1.28) | 0.58 |
| (SP+/DS+) /(SP+/DS−) | Model1 | 1.34 (1.10, 1.64) | 0.004 | 1.00 (0.43, 2.30) | 0.99 |
|  | Model2 | 1.31 (1.07, 1.61) | 0.009 | 0.72 (0.26, 2.02) | 0.54 |
|  | Model3 | 1.29 (1.05, 1.60) | 0.02 | 0.71 (0.25, 2.01) | 0.52 |
| (SP−/DS+) /(SP+/DS−) | Model1 | 1.51 (1.27, 1.79) | <0.001 | 1.54 (0.96, 2.47) | 0.08 |
|  | Model2 | 1.49 (1.25, 1.77) | <0.001 | 1.95 (1.17, 3.25) | 0.01 |
|  | Model3 | 1.49 (1.24, 1.79) | <0.001 | 1.85 (1.09, 3.13) | 0.02 |

Notes: *CHARLS* China Health and Retirement Longitudinal Study,*ELSA* English Longitudinal Study of Ageing, *SP+* participation in ≥1 social activity at baseline, *SP−* no participation in any activity, *DS+* CES-D score above the cut-point (CHARLS: CES-D-10 >10; ELSA: CES-D-8 ≥4), *DS−* below the cut-point, *Model 1* unadjusted (crude) model, *Model 2* adjusted for age, sex, marital status, education level, and annual household expenditure, *Model 3* adjusted for *Model 2* plus smoking status, alcohol drinking status, BMI, and number of chronic conditions.
